# Supplementary material
Source: PubMed Central journal article supplement (PMC2663337)
Supplement: NIHMS64396-supplement-S1-S8.pdf [file NIHMS64396-supplement-S1-S8.pdf]

Figure S1

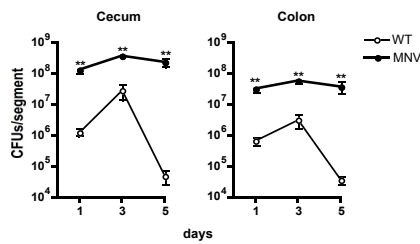

**Figure S1: Antibiotic treatment increases VRE colonization in the cecum and colon.** Wild type mice were treated with metronidazole (M; 1g/l), neomycin (N; 500mg/l) and vancomycin (V; 1g/l) (MNV) in drinking water starting 2 days before infection. All mice were orally infected with  $10^9$  VRE by gavage on day 0. Bacterial counts within the cecum and colon were determined 1, 3 and 5 days after VRE infection, n=5 each group and each timepoint. \*\*p = 0.008, Mann-Whitney. Error bars denote S.E.M.

Figure S2

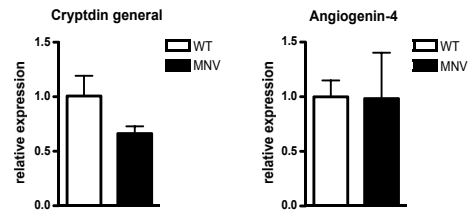

**Figure S2 Expression of Cryptdin and Angiogenin-4 in distal small intestines of wild-type and MNV treated mice.** mRNA was extracted from the terminal ileum of wild type mice and mice receiving antibiotics (MNV) for 7 days. Cryptdins and Angiogenin-4 expression were examined by quantitative real-time PCR. Expression levels were normalized to GAPDH and the results are expressed relative to wild type mice; n= 7-10 mice per group. Error bars denote S.E.M.

Figure S3

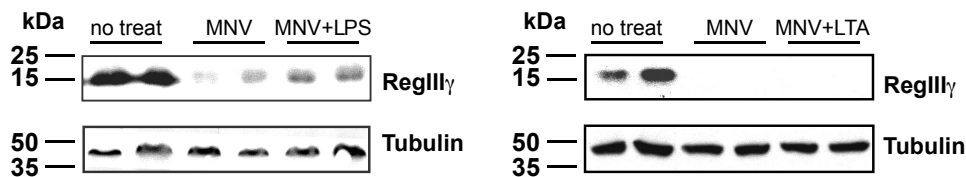

**Figure S3 Prophylactic administration of oral LPS upregulates RegIII $\gamma$  protein levels.** Protein extracts from the distal small intestine of wild type mice, mice receiving antibiotics (MNV) and mice receiving antibiotics (MNV) + LPS (2-

4 $\mu$ g/ $\mu$ l) (right panel) or MNV + LTA (0.25  $\mu$ g/ $\mu$ l) (left panel) for 7 days were analyzed by Western blotting with RegIII $\gamma$ -specific antiserum. Tubulin was used as a loading control.

Figure S4

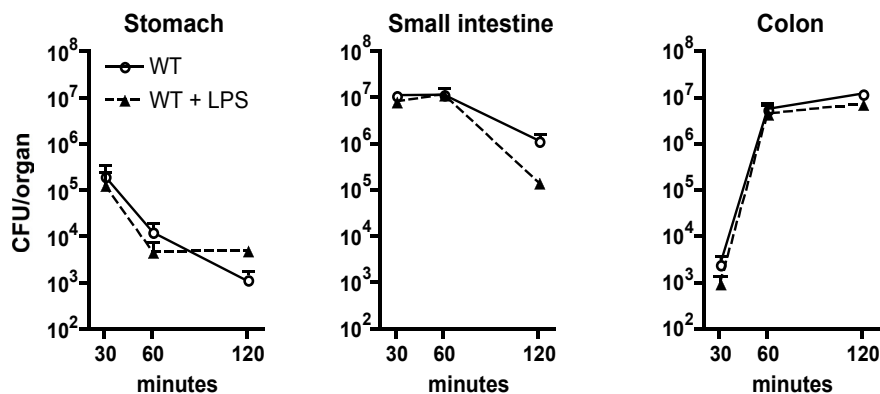

**Figure S4 LPS does not directly kill VRE when orally administered.** Mice were treated with LPS in drinking water for 6 hours prior oral infection with  $10^9$  VRE.

Bacterial burden was determined in stomach, small intestine and colon after 30, 60 and 120 minutes. Error bars denote S.E.M.

Figure S5

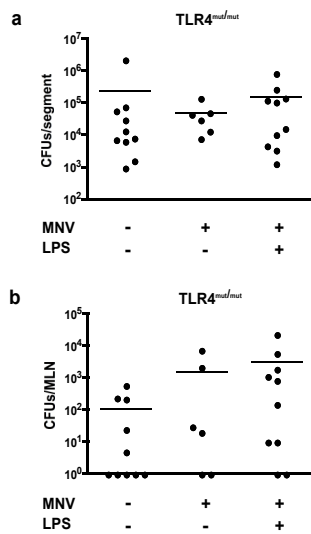

**Figure S5** (a) *TLR4<sup>mut/mut</sup>* mice (C3HeJ), either left untreated or treated for 7 days with MNV or MNV + LPS, were orally infected with 10<sup>10</sup> VRE. 24 hours later, bacterial counts within the distal small intestine were determined, n=6-10. (b) *TLR4<sup>mut/mut</sup>* mice (C3HeJ), either left untreated or treated for 7 days with MNV or MNV + LPS, were orally infected with 10<sup>10</sup> VRE. 24 hours later, bacterial counts within MLNs were determined, 0 colonies in MLNs were plotted as 1, n=6-10.

Figure S6

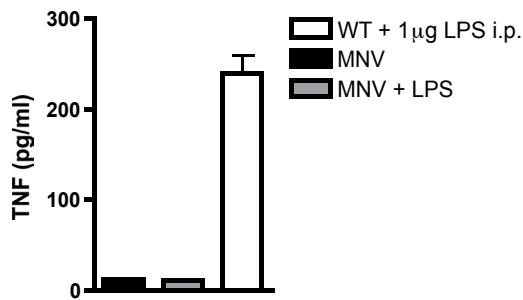

**Figure S6** Oral LPS treatment does not lead to systemic immune activation. TNF levels in serum were determined in mice receiving antibiotics, antibiotics + LPS (4 µg/µl) for 7 days or in wild type mice injected with 1 µg LPS i.p. n=5 for each, MNV and MNV + LPS, n=2 for mice receiving i.p. LPS. Error bars denote S.E.M.

Figure S7

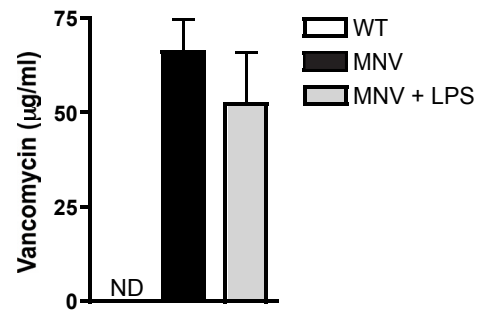

**Figure S7** Similar vancomycin levels in the colon of wild-type, antibiotic and antibiotic + LPS treated mice.

Vancomycin levels in the colon of wild-type, antibiotic and antibiotic + LPS (4 µg/µl) treated mice were determined 7 days after treatment started; n=7. Error bars denote S.E.M.

Figure S8

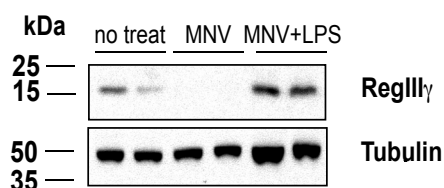

**Figure S8.** Oral treatment of mice with LPS upregulates RegIII $\gamma$  protein levels. Protein extracts from the distal small intestine of wild type mice, mice receiving antibiotics (MNV) and mice treated first with antibiotics for 4 days and then receiving a combination of antibiotics (MNV) + LPS (1-4 µg/µl) for 7 days were analyzed by Western blotting with RegIII $\gamma$ -specific antiserum. Tubulin was used as a loading control.
